# Supplementary material for: Peroxidase-like Cu–Fe bimetal oxide mesoporous nanospheres identified for the efficient recognition of toxic o-aminophenol and bioactive glutathione
Source: Royal Society of Chemistry journal article supplement (doi:10.1039/d3tc01914d), 2023-01-01
Supplement: d3tc01914d1.pdf [file d3tc01914d1.pdf]

## Supplementary Information

### **Peroxidase-like bimetal Cu-Fe oxide mesoporous nano-spheres identified for efficient recognition of toxic *o*-Aminophenol and bioactive glutathione**

Xuemei Zhou,<sup>a,§</sup> Lingmin Kong,<sup>a,§</sup> Junkai Hao,<sup>a</sup> Jing Feng,<sup>a</sup> Shuo Sun,<sup>a</sup> Chuanzhen Zhou,<sup>b</sup>

Yanmin Liu,<sup>c</sup> Zhengquan Yan,<sup>a,\*</sup> Xiao Zhu,<sup>a</sup> Lei Hu<sup>a,\*</sup>

*<sup>a</sup>School of Chemistry and Chemical Engineering & Key Laboratory of Catalytic Conversion  
and Clean Energy in Universities of Shandong Province, Qufu Normal University, Qufu, 273165,  
China*

*<sup>b</sup>College of Chemical and Biological Engineering, Shandong University of Science and  
Technology, Qingdao, 266590, China*

*<sup>c</sup>Qufu Agriculture-Technology Extension and Service Center, Qufu, 273100, China*

Email: [kaixinguolei333@163.com](mailto:kaixinguolei333@163.com), [yanzhq2008@163.com](mailto:yanzhq2008@163.com)

---

<sup>§</sup> The two authors contributed equally to the work

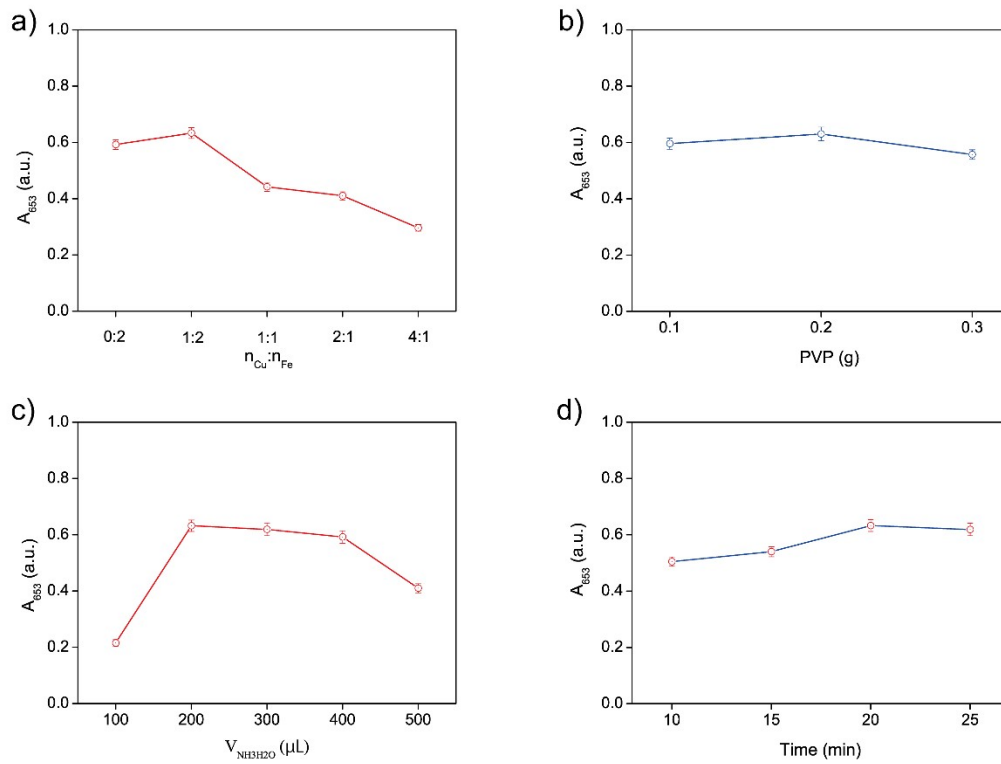

**Figure S1.** The optimized conditions of a) mole feed ratios of Cu to Fe, b) PVP dosages, c) ammonia dosage and d) microwave radiation time.

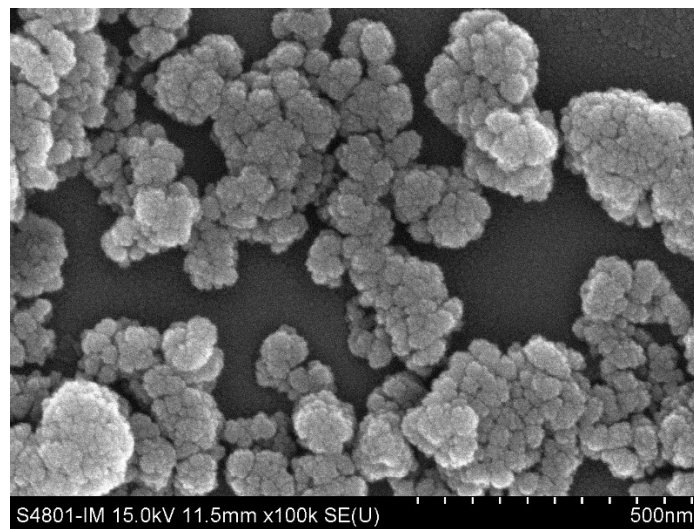

**Figure S2.** SEM graph of the proposed Cu-Fe MNPs

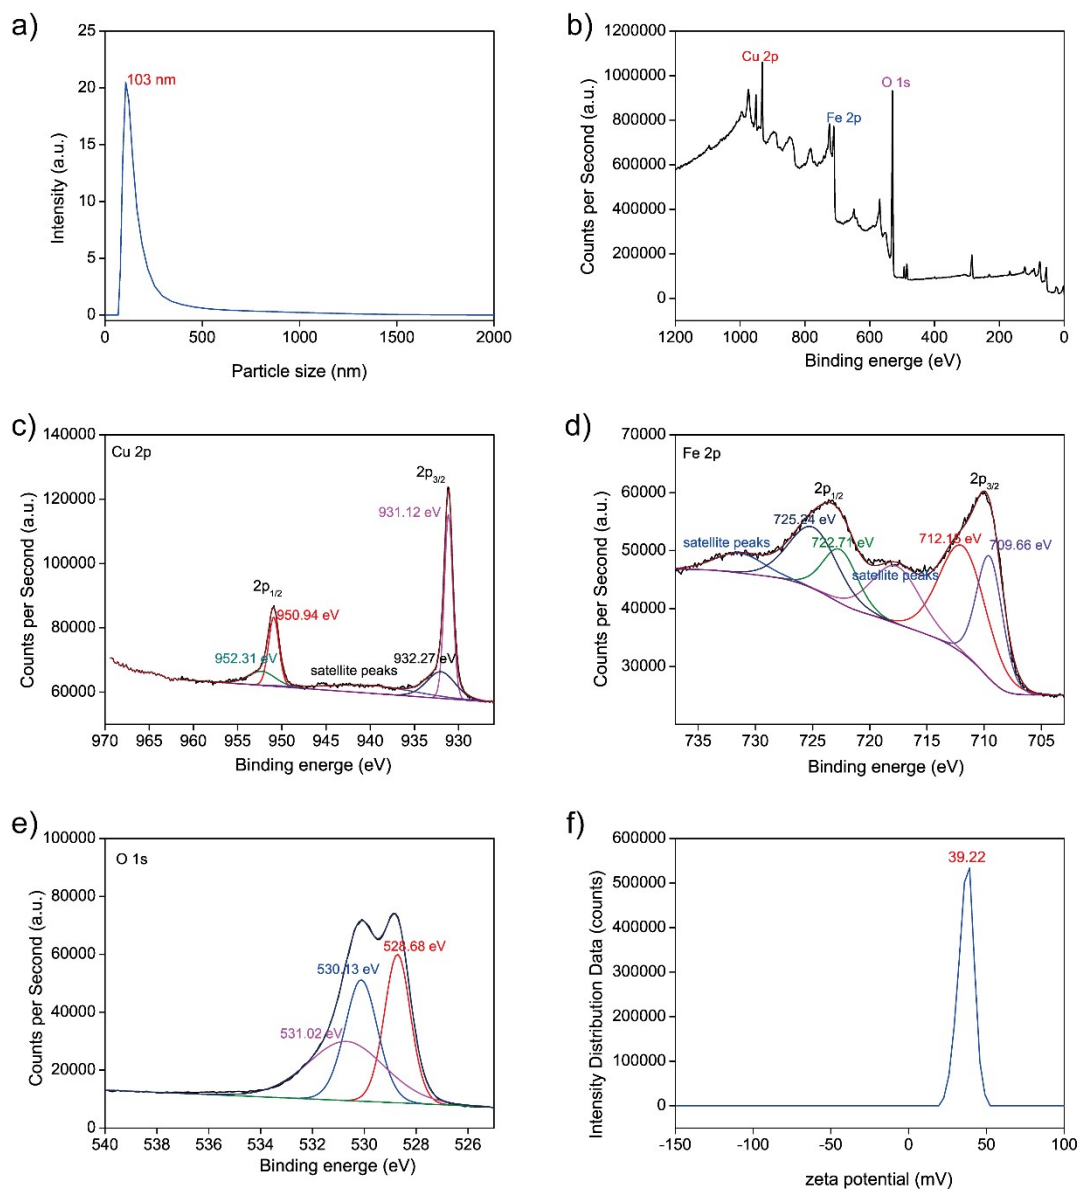

**Figure S3.** a) DLS curve, b) XPS wide angle spectra, high-resolution spectra of c) Cu2p, d) Fe2p, e) O1s and f)  $\zeta$  potential of the proposed Cu-Fe MNPs

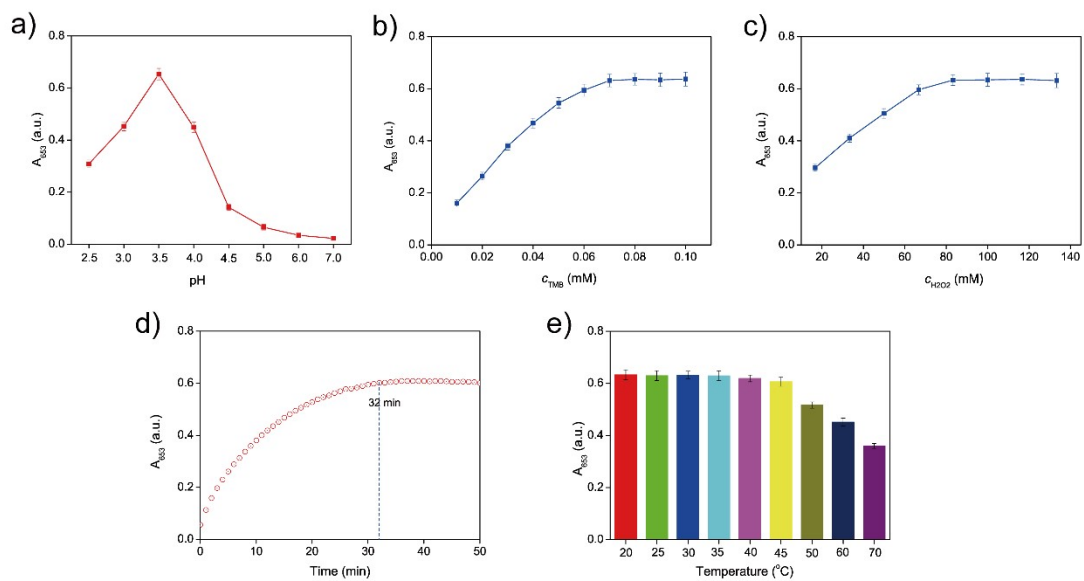

**Figure S4.** The effects of a) pH, b) TMB concentration, c)  $H_2O_2$  concentration, d) reaction time and e) reaction temperature on absorbance intensity at 653 nm ( $A_{653}$ ) of Cu-Fe MNPs

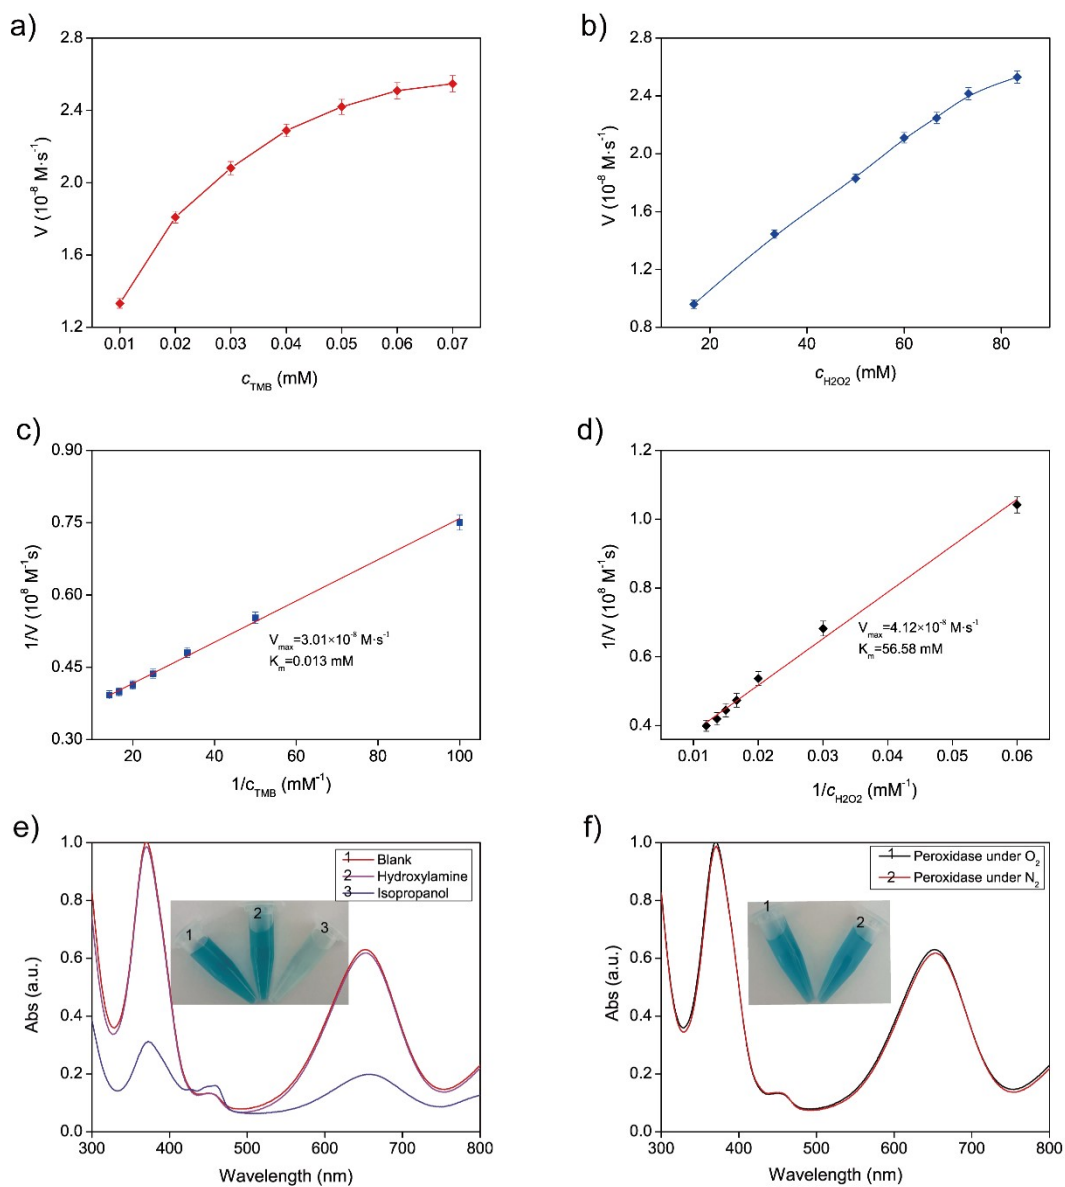

**Figure S5.** Steady-state kinetics of Cu-Fe MNPs with a) different  $c_{\text{TMB}}$ , b)  $c_{\text{H}_2\text{O}_2}$ ; and the corresponding double-reciprocal plots of  $1/v$  against c)  $1/c_{\text{TMB}}$  and d)  $1/c_{\text{H}_2\text{O}_2}$  with changing  $c_{\text{TMB}}$  or  $c_{\text{H}_2\text{O}_2}$  but fixed the others; UV-vis spectra and color changes (Insert) for Cu-Fe MNPs-TMB- $\text{H}_2\text{O}_2$  system e) in the presence of isopropanol and hydroxylammonium chloride and f) under air-saturated and  $\text{N}_2$ -saturated conditions

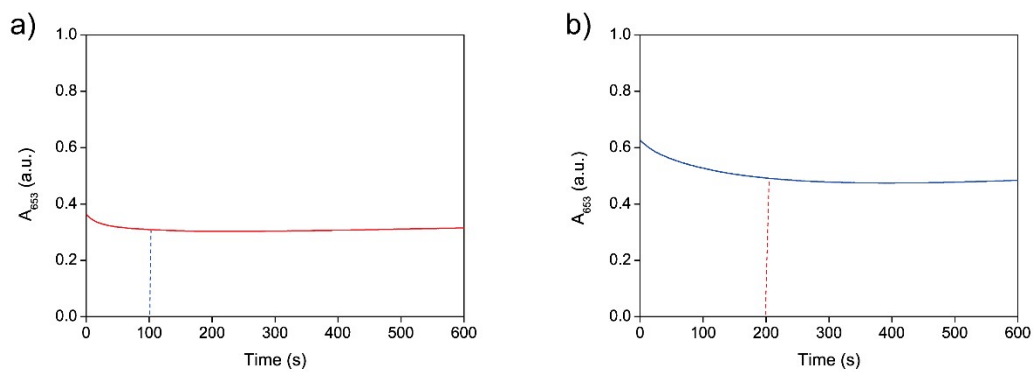

**Figure S6.** Time response curves of  $A_{653}$  upon the addition of a) *o*-AP and b) GSH respectively

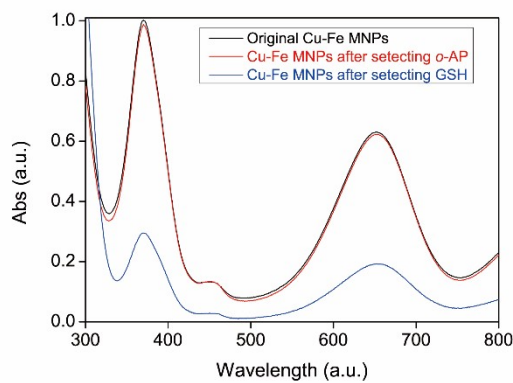

**Figure S7.** The comparison for UV-vis absorption spectra of TMB- $H_2O_2$  systems catalyzed by original Cu-Fe MNPs (Blank), Cu-Fe MNPs after detecting *o*-AP (Red) and Cu-Fe MNPs after detecting GSH (Blue) respectively (0.1 mg/mL Cu-Fe MNPs, pH 3.5, 0.07 mM TMB, 83.3 mM  $H_2O_2$  and incubated 35 min at 25 °C)

**Table S1.** Calculation of initial reaction rate: The concentration of TMB-derived oxidation products was calculated by Lambert-Beer Law with a molar absorption coefficient of  $39000 \text{ M}^{-1}\cdot\text{cm}^{-1}$

| Time(s<br>) | $A$   | The concentration of TMB-derived oxidation products<br>(M)<br>( $c=A/\epsilon b$ , where $\epsilon=39000 \text{ M}^{-1}\cdot\text{cm}^{-1}$ , $b=1 \text{ cm}$ ) | Rate<br>$R=(c/t)_{\text{average}}$<br>( $\text{M}\cdot\text{s}^{-1}$ ) |
|-------------|-------|------------------------------------------------------------------------------------------------------------------------------------------------------------------|------------------------------------------------------------------------|
| 30          | 0.111 | $2.85\times 10^{-6}$                                                                                                                                             |                                                                        |
| 60          | 0.125 | $3.21\times 10^{-6}$                                                                                                                                             |                                                                        |
| 90          | 0.139 | $3.56\times 10^{-6}$                                                                                                                                             |                                                                        |
| 120         | 0.152 | $3.87\times 10^{-6}$                                                                                                                                             |                                                                        |
| 150         | 0.164 | $4.21\times 10^{-6}$                                                                                                                                             |                                                                        |
| 180         | 0.176 | $4.51\times 10^{-6}$                                                                                                                                             |                                                                        |
| 210         | 0.188 | $4.82\times 10^{-6}$                                                                                                                                             |                                                                        |
| 240         | 0.199 | $5.11\times 10^{-6}$                                                                                                                                             |                                                                        |
| 270         | 0.209 | $5.36\times 10^{-6}$                                                                                                                                             |                                                                        |
| 300         | 0.219 | $5.62\times 10^{-6}$                                                                                                                                             | $2.57\times 10^{-8}$                                                   |
| 330         | 0.231 | $5.89\times 10^{-6}$                                                                                                                                             |                                                                        |
| 360         | 0.24  | $6.15\times 10^{-6}$                                                                                                                                             |                                                                        |
| 390         | 0.252 | $6.41\times 10^{-6}$                                                                                                                                             |                                                                        |
| 420         | 0.261 | $6.67\times 10^{-6}$                                                                                                                                             |                                                                        |
| 450         | 0.269 | $6.89\times 10^{-6}$                                                                                                                                             |                                                                        |
| 480         | 0.278 | $7.15\times 10^{-6}$                                                                                                                                             |                                                                        |
| 510         | 0.289 | $7.38\times 10^{-6}$                                                                                                                                             |                                                                        |
| 540         | 0.297 | $7.62\times 10^{-6}$                                                                                                                                             |                                                                        |
| 570         | 0.305 | $7.82\times 10^{-6}$                                                                                                                                             |                                                                        |
| 600         | 0.314 | $8.05\times 10^{-6}$                                                                                                                                             |                                                                        |

**Table S2.** Comparing the steady-state kinetic parameters of the present Cu-Fe MNPs with other nanomaterials-based peroxidase mimics reported previously

| Nanomaterials                                    | Substrates                        | $K_m$ (mM)   | $V_{max}$ ( $10^{-8} \text{ M}\cdot\text{s}^{-1}$ ) | Refs.            |
|--------------------------------------------------|-----------------------------------|--------------|-----------------------------------------------------|------------------|
| Fe <sub>3</sub> O <sub>4</sub> MNPs <sup>1</sup> | TMB                               | 0.098        | 3.44                                                | 1                |
|                                                  | H <sub>2</sub> O <sub>2</sub>     | 154          | 9.78                                                |                  |
| HRP                                              | TMB                               | 0.434        | 10.00                                               | 1                |
|                                                  | H <sub>2</sub> O <sub>2</sub>     | 3.7          | 8.71                                                |                  |
| IrO <sub>2</sub> /rGO <sup>2</sup>               | TMB                               | 0.276        | 42.77                                               | 2                |
|                                                  | H <sub>2</sub> O <sub>2</sub>     | 229.4        | 372.9                                               |                  |
| MA-Hem/Au-Ag <sup>3</sup>                        | TMB                               | 2.39         | 1.42                                                | 3                |
|                                                  | H <sub>2</sub> O <sub>2</sub>     | 2.71         | 11.4                                                |                  |
| Cu NCs                                           | TMB                               | 0.648        | 5.96                                                | 4                |
|                                                  | H <sub>2</sub> O <sub>2</sub>     | 29.16        | 4.22                                                |                  |
| <b>Cu-Fe MNPs</b>                                | <b>TMB</b>                        | <b>0.013</b> | <b>3.01</b>                                         | <b>This work</b> |
|                                                  | <b>H<sub>2</sub>O<sub>2</sub></b> | <b>56.58</b> | <b>4.12</b>                                         |                  |

1. Fe<sub>3</sub>O<sub>4</sub> MNPs: Fe<sub>3</sub>O<sub>4</sub> magnetic nanoparticles
2. IrO<sub>2</sub>/rGO: IrO<sub>2</sub> nano-particles on reduced graphene oxide (rGO) nanosheets
3. MA-Hem/Au-Ag: gold-silver bimetal into Hemin(Hem)-coupled melamine (MA) polymer matrix



**Table S3.** Comparing the determination of *o*-AP by Cu-Fe MNPs with other nanomaterials reported previously

| Materials                                       | Method                                 | Analytes           | Linear range ( $\mu\text{M}$ ) | LOD ( $\mu\text{M}$ ) | Refs.            |
|-------------------------------------------------|----------------------------------------|--------------------|--------------------------------|-----------------------|------------------|
| GNP-modified ITO microelectrodes <sup>1</sup>   | dual-channel microchip electrophoresis | <i>o</i> -AP       | 1-500                          | 0.41                  | 5                |
|                                                 | gas chromatography                     | <i>o</i> -AP       |                                | 23.48                 | 6                |
| cationic p-(quaternary ammonium) calix[4]-arene | capillary electrophoresis              | <i>o</i> -AP       |                                | 2.64                  | 7                |
| SPCE <sup>2</sup>                               | Electrochemical                        | <i>o</i> -AP       | 0.2-100                        | 0.07                  | 8                |
| NH <sub>2</sub> -SBA-15/CPE <sup>3</sup>        | Electrochemical                        | <i>o</i> -AP       | 0.3-18                         | 0.05                  | 9                |
| Ce-CDs <sup>4</sup>                             | Fluorescent                            | <i>o</i> -AP       | 0.1-10                         | 0.033                 | 10               |
| modified PDMS microchip <sup>5</sup>            | microchips                             | <i>o</i> -AP       | 50-400                         | 10.0                  | 11               |
| Triethylamine (pH 8)                            | Liquid chromatography                  | <i>o</i> -AP       | 9.17-450                       | 4.22                  | 12               |
| <b>Cu-Fe MNPs</b>                               | <b>Colorimetry</b>                     | <b><i>o</i>-AP</b> | <b>0.33-12.67</b>              | <b>0.016</b>          | <b>This work</b> |

1、GNP-modified ITO microelectrodes: A gold nanoparticle-modified indium tin oxide microelectrode

2、SPCE: Electrochemically pretreated screen-printed carbon electrodes.

3、NH<sub>2</sub>-SBA15/CPE: Amino-functionalized SBA15 modified carbon paste electrode

4、Ce-CDs: Ceriumdoped carbon dots

5、modified PDMS microchip: Modified poly (dimethylsiloxane) (PDMS )microchips

**Table S4.** Comparing the determination of GSH by Cu-Fe MNPs with other nanomaterials reported previously

| Materials                               | Method                       | Analytes   | Linear range<br>( $\mu\text{M}$ ) | LOD<br>( $\mu\text{M}$ ) | Refs.            |
|-----------------------------------------|------------------------------|------------|-----------------------------------|--------------------------|------------------|
| MCE-CL <sup>1</sup>                     | microchip<br>electrophoresis | GSH        | 3-600                             | 0.96                     | 13               |
| Cy-AuNCs <sup>2</sup>                   | colorimetric                 | GSH        | 0-400                             | 10.00                    | 14               |
| Met-AuNCs@MnO <sub>2</sub> <sup>3</sup> | Fluorescent                  | GSH        | 1-700                             | 0.068                    | 15               |
| AgNPs                                   | colorimetric                 | GSH        | 0-400                             | 4.11                     | 16               |
| TCFCl-GSH <sup>4</sup>                  | Fluorescent                  | GSH        | 0-500                             | 0.45                     | 17               |
| <b>Cu-Fe MNPs</b>                       | <b>Colorimetry</b>           | <b>GSH</b> | <b>0.66-21.67</b>                 | <b>0.033</b>             | <b>This work</b> |

- 1、 MCE-CL: microchip electrophoresis chemiluminescence
- 2、 Cy-AuNCs: Cytidine-Au nanoclusters
- 3、 Met-AuNCs@MnO<sub>2</sub>: methionine-capped AuNCs and MnO<sub>2</sub>
- 4、 TCFCl-GSH: Long-wavelength TCF-based fluorescence probes

### References:

1. L. Z. Gao, J. Zhuang, L. Nie, J. B. Zhang, Y. Zhang, N. Gu, T. H. Wang, J. Feng, D. L. Yang, S. Perrett and X. Yan, *Nat. Nanotechnol.*, 2007, **2**, 577-583.
2. X. L. Liu, X. H. Wang, Q. S. Han, C. Qi, C. Wang and R. Yang, *Talanta*, 2019, **203**, 227-234.
3. H. Liu, Y. Hua, Y. Y. Cai, L. P. Feng, S. Li and H. Wang, *Anal. Chim. Acta*, 2019, **1092**, 57-65.
4. L. Hu, Y. Yuan, L. Zhang, J. Zhao, S. Majeed and G. Xu, *Anal. Chim. Acta*, 2013, **762**, 83-86.
5. G. Z. Zhu, Q. H. Song, W. F. Liu, X. X. Yan, J. Xiao and C. P. Chen, *Anal. Methods*, 2017, **9**, 4319-4326.
6. A. Kumar and A. Panwar, *Microchim. Acta*, 1993, **111**, 177-182.
7. W. C. Yang, X. D. Yu, A. M. Yu and H. Y. Chen, *J. chromatography. A*, 2001, **910**, 311-318.
8. W. Y. Su, S. M. Wang and S. H. Cheng, *J. Electroanal. Chem.*, 2011, **651**, 166-172.
9. S. Duan, X. Zhang, S. Xu and C. L. Zhou, *Electrochim. Acta*, 2013, **88**, 885-891.
10. D. D. Zhao, Y. J. Huang, B. F. Shi, S. P. Li and S. L. Zhao, *ACS Sustain. Chem. Eng.*, 2021, **9**, 8136-8141.
11. Y. Xiao, K. Wang, X.-D. Yu, J.-J. Xu and H.-Y. Chen, *Talanta*, 2007, **72**, 1316-1321.
12. S. P. Wang and T. H. Huang, *Anal. Chim. Acta*, 2005, **534**, 207-214.
13. M. Shi, Y. Huang, J. J. Zhao, S. T. Li, R. J. Liu and S. L. Zhao, *Talanta*, 2018, **179**, 466-471.

14. C. F. Jiang, C. Zhang, J. Song, X. J. Ji and W. Wang, *Spectrochim. Acta, Part A*, 2021, **250**, 119316.
15. F. M. Sang, M. L. Li, S. Y. Yin, H. H. Shi, Y. Zhao and Z. Z. Zhang, *Spectrochim. Acta, Part A*, 2021, **256**, 119743.
16. I. Sanskriti and K. K. Upadhyay, *New J. Chem.*, 2017, **41**, 4316-4321.
17. A. C. Sedgwick, J. E. Gardiner, G. Kim, M. Yevlevskis, M. D. Lloyd, A. T. A. Jenkins, S. D. Bull, J. Yoon and T. D. James, *Chem. Commun.*, 2018, **54**, 4786-4789.
